# Supplementary material
Source: PubMed Central journal article supplement (PMC6800769)
Supplement: NIHMS1035944-supplement-Supplemental_Material.pdf [file NIHMS1035944-supplement-Supplemental_Material.pdf]

# CANNABIS AND ALCOHOL USE FOR SLEEP AID

## Supplemental Materials

Table S1  
Bivariate Correlation Coefficients of Study Variables

|                                    | <i>r</i>    |             |             |             |             |             |             |             |             |             |             |             |            |            |            |             |             |             |             |      |            |            |            |            |   |
|------------------------------------|-------------|-------------|-------------|-------------|-------------|-------------|-------------|-------------|-------------|-------------|-------------|-------------|------------|------------|------------|-------------|-------------|-------------|-------------|------|------------|------------|------------|------------|---|
|                                    | 1           | 2           | 3           | 4           | 5           | 6           | 7           | 8           | 9           | 10          | 11          | 12          | 13         | 14         | 15         | 16          | 17          | 18          | 19          | 20   | 21         | 22         | 23         | 24         |   |
| Baseline Variables                 |             |             |             |             |             |             |             |             |             |             |             |             |            |            |            |             |             |             |             |      |            |            |            |            |   |
| 1. Past-Month Cannabis Sleep Aid   | —           |             |             |             |             |             |             |             |             |             |             |             |            |            |            |             |             |             |             |      |            |            |            |            |   |
| 2. Past-Month Alcohol Sleep Aid    | <b>.23</b>  | —           |             |             |             |             |             |             |             |             |             |             |            |            |            |             |             |             |             |      |            |            |            |            |   |
| 3. Male Sex                        | <b>.08</b>  | <b>.08</b>  | —           |             |             |             |             |             |             |             |             |             |            |            |            |             |             |             |             |      |            |            |            |            |   |
| 4. Negative Mood                   | <b>.16</b>  | <b>.09</b>  | <b>-.10</b> | —           |             |             |             |             |             |             |             |             |            |            |            |             |             |             |             |      |            |            |            |            |   |
| 5. Poor Sleep Quality Rating       | <b>.15</b>  | -.03        | <b>-.08</b> | <b>.26</b>  | —           |             |             |             |             |             |             |             |            |            |            |             |             |             |             |      |            |            |            |            |   |
| 6. Sleep Duration                  | <b>-.05</b> | -.03        | <b>-.06</b> | <b>-.09</b> | <b>-.25</b> | —           |             |             |             |             |             |             |            |            |            |             |             |             |             |      |            |            |            |            |   |
| 7. Sleep Onset Latency             | <b>.19</b>  | .02         | <b>-.05</b> | <b>.25</b>  | <b>.33</b>  | <b>-.15</b> | —           |             |             |             |             |             |            |            |            |             |             |             |             |      |            |            |            |            |   |
| 8. Waking After Sleep Onset        | -.01        | <b>-.04</b> | <b>-.14</b> | <b>.21</b>  | <b>.17</b>  | <b>.05</b>  | <b>.20</b>  | —           |             |             |             |             |            |            |            |             |             |             |             |      |            |            |            |            |   |
| 9. Daytime Fatigue                 | <b>.05</b>  | .00         | <b>-.10</b> | <b>.28</b>  | <b>.20</b>  | -.00        | <b>.07</b>  | <b>.21</b>  | —           |             |             |             |            |            |            |             |             |             |             |      |            |            |            |            |   |
| 10. Past-Month Cannabis Frequency  | <b>.70</b>  | .02         | <b>.14</b>  | <b>.08</b>  | <b>.04</b>  | <b>-.15</b> | .02         | -.01        | <b>-.07</b> | —           |             |             |            |            |            |             |             |             |             |      |            |            |            |            |   |
| 11. Negative Cannabis Consequences | <b>.43</b>  | -.01        | <b>.24</b>  | <b>.22</b>  | <b>.07</b>  | <b>-.12</b> | <b>.08</b>  | .01         | <b>.26</b>  | <b>.57</b>  | —           |             |            |            |            |             |             |             |             |      |            |            |            |            |   |
| 12. Past-Month Alcohol Quantity    | <b>.19</b>  | <b>.06</b>  | <b>.24</b>  | <b>-.18</b> | -.02        | .00         | <b>-.04</b> | <b>-.05</b> | <b>-.13</b> | <b>.18</b>  | <b>.14</b>  | —           |            |            |            |             |             |             |             |      |            |            |            |            |   |
| 13. Negative Alcohol Consequences  | <b>.27</b>  | <b>.07</b>  | .03         | <b>.13</b>  | <b>.08</b>  | -.01        | -.02        | .02         | <b>.22</b>  | <b>.25</b>  | <b>.30</b>  | <b>.38</b>  | —          |            |            |             |             |             |             |      |            |            |            |            |   |
| Daily Variables                    |             |             |             |             |             |             |             |             |             |             |             |             |            |            |            |             |             |             |             |      |            |            |            |            |   |
| 14. Cannabis Sleep Aid             | <b>.28</b>  | .01         | -.01        | <b>.08</b>  | <b>.07</b>  | <b>-.04</b> | .06         | <b>.05</b>  | <b>.06</b>  | <b>.26</b>  | <b>.22</b>  | .03         | <b>.07</b> | —          |            |             |             |             |             |      |            |            |            |            |   |
| 15. Alcohol Sleep Aid              | .03         | <b>.07</b>  | .01         | <b>.05</b>  | .01         | -.03        | <b>.05</b>  | <b>.04</b>  | <b>.06</b>  | .01         | -.01        | .02         | .01        | .02        | —          |             |             |             |             |      |            |            |            |            |   |
| 16. Negative Affect                | <b>.13</b>  | <b>.10</b>  | <b>-.06</b> | <b>.48</b>  | <b>.14</b>  | <b>-.06</b> | <b>.15</b>  | <b>.07</b>  | <b>.16</b>  | <b>.07</b>  | <b>.23</b>  | <b>-.06</b> | <b>.17</b> | <b>.06</b> | .02        | —           |             |             |             |      |            |            |            |            |   |
| 17. Poor Sleep Quality Rating      | .03         | .02         | <b>-.05</b> | <b>.06</b>  | <b>.23</b>  | -.01        | <b>.14</b>  | <b>.05</b>  | <b>.10</b>  | <b>-.04</b> | .02         | .01         | <b>.10</b> | -.02       | .02        | <b>.16</b>  | —           |             |             |      |            |            |            |            |   |
| 18. Sleep Duration                 | .02         | <b>-.04</b> | <b>-.05</b> | <b>-.04</b> | <b>-.11</b> | <b>.25</b>  | <b>-.04</b> | <b>.06</b>  | .03         | -.03        | <b>-.08</b> | .02         | .00        | <b>.05</b> | .02        | <b>-.10</b> | <b>-.40</b> | —           |             |      |            |            |            |            |   |
| 19. Sleep Onset Latency            | -.03        | <b>.04</b>  | .03         | <b>.05</b>  | <b>.10</b>  | -.00        | <b>.21</b>  | <b>.05</b>  | .00         | -.01        | -.00        | -.02        | -.03       | -.03       | .03        | <b>.06</b>  | <b>.17</b>  | <b>-.08</b> | —           |      |            |            |            |            |   |
| 20. Wake-Time After Sleep Onset    | .02         | .03         | -.03        | <b>.06</b>  | .05         | .02         | <b>.13</b>  | <b>.07</b>  | <b>.06</b>  | -.01        | -.00        | <b>-.13</b> | -.05       | -.03       | .04        | .01         | <b>.17</b>  | -.00        | .06         | —    |            |            |            |            |   |
| 21. Daytime Fatigue                | -.02        | <b>.05</b>  | <b>-.10</b> | <b>.14</b>  | <b>.16</b>  | .03         | <b>.11</b>  | <b>.04</b>  | <b>.19</b>  | -.03        | .01         | .01         | <b>.15</b> | .01        | .02        | <b>.23</b>  | <b>.15</b>  | -.03        | <b>.05</b>  | .05  | —          |            |            |            |   |
| 22. Cannabis Frequency             | <b>.44</b>  | .01         | <b>.17</b>  | -.00        | <b>-.05</b> | <b>-.16</b> | <b>-.04</b> | <b>.02</b>  | -.03        | <b>.56</b>  | <b>.41</b>  | <b>.04</b>  | <b>.05</b> | <b>.45</b> | .01        | .00         | <b>-.06</b> | -.01        | <b>-.05</b> | .01  | -.04       | —          |            |            |   |
| 23. Negative Cannabis Consequences | <b>.29</b>  | <b>.04</b>  | <b>.08</b>  | .01         | <b>-.05</b> | -.00        | -.02        | .02         | <b>.05</b>  | <b>.36</b>  | <b>.28</b>  | <b>.09</b>  | <b>.09</b> | <b>.40</b> | .01        | <b>.06</b>  | <b>-.04</b> | <b>.05</b>  | -.03        | -.01 | <b>.06</b> | <b>.46</b> | —          |            |   |
| 24. Alcohol Quantity               | <b>.11</b>  | <b>.05</b>  | <b>.07</b>  | -.02        | -.03        | <b>.05</b>  | -.03        | -.02        | -.01        | <b>.15</b>  | .05         | <b>.21</b>  | <b>.21</b> | -.03       | <b>.10</b> | <b>-.05</b> | <b>.04</b>  | -.03        | <b>-.09</b> | -.03 | -.01       | <b>.13</b> | .02        | —          |   |
| 25. Negative Alcohol Consequences  | <b>.09</b>  | <b>.06</b>  | .03         | <b>.04</b>  | -.01        | .01         | -.02        | -.03        | <b>.06</b>  | <b>.06</b>  | <b>.08</b>  | <b>.10</b>  | <b>.23</b> | .00        | <b>.07</b> | .03         | <b>.10</b>  | <b>-.06</b> | <b>-.05</b> | -.03 | .03        | <b>.10</b> | <b>.13</b> | <b>.53</b> | — |

Note. *N*=217. Pearson's correlation coefficients are reported for two continuous variables; Spearman's coefficients (*r<sub>s</sub>*) are reported for continuous and dichotomous variables; Phi coefficients (*r<sub>φ</sub>*) are reported for two dichotomous variables. Significant correlation coefficients at *p*<.05 are highlighted in bold font.
